# Supplementary material for: Opposite Macrophage Polarization in Different Subsets of Ovarian Cancer: Observation from a Pilot Study
Source: MDPI journal article supplement (doi:10.3390/cells9020305), 2020-01-27
Supplement: s1 [file s1]

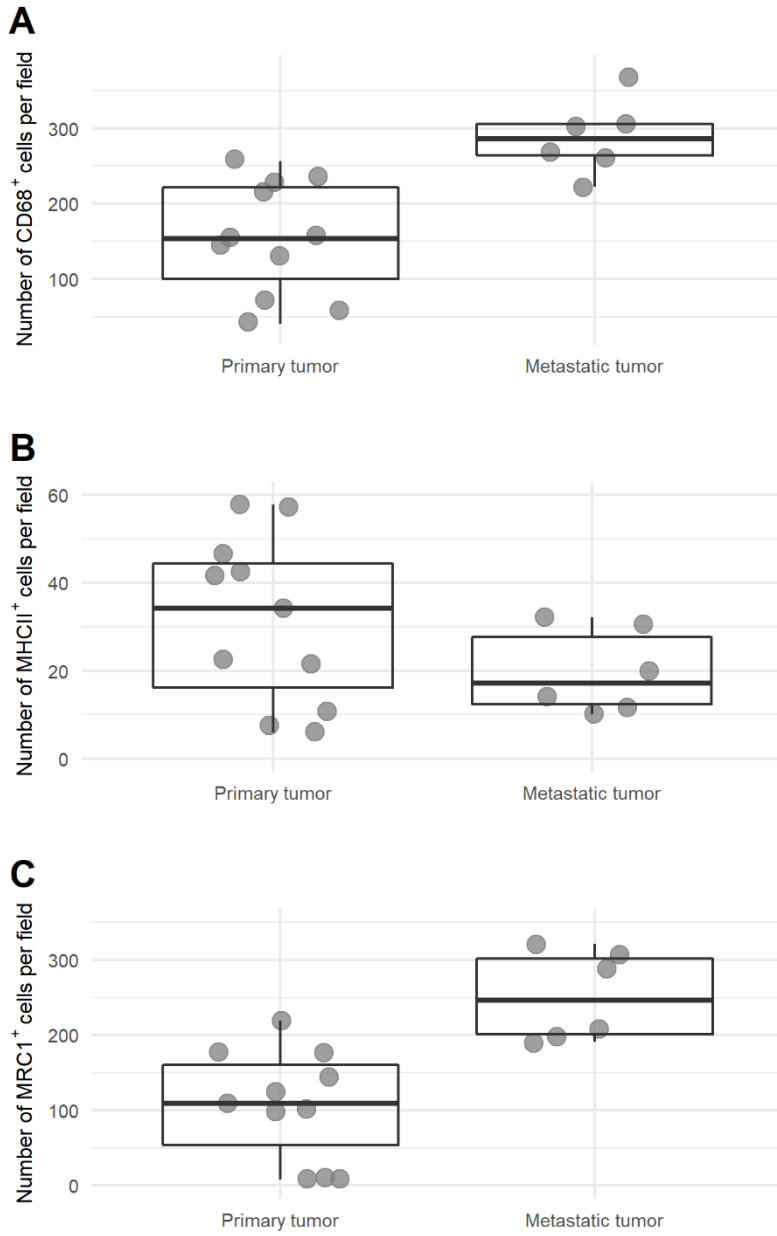

**Supplementary Figure 1. Bulk analysis of primary and metastatic tumor site biopsies stained for number of cells being (a) CD68<sup>+</sup> (b) MHCII<sup>+</sup> (c) MRC1<sup>+</sup>.**
